# Supplementary material
Source: PubMed Central journal article supplement (PMC1449672)

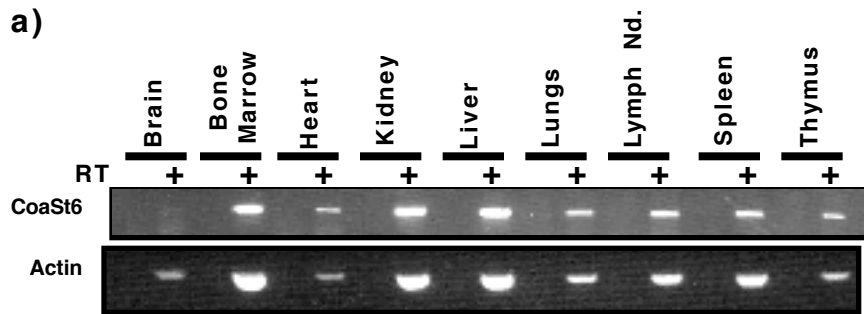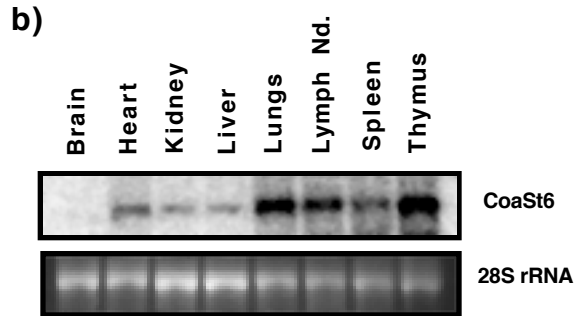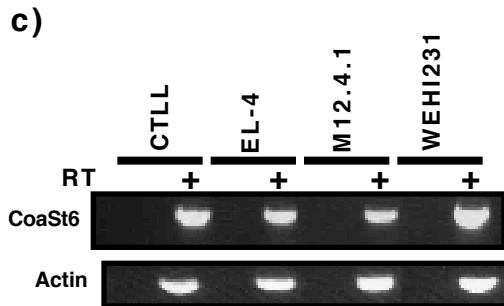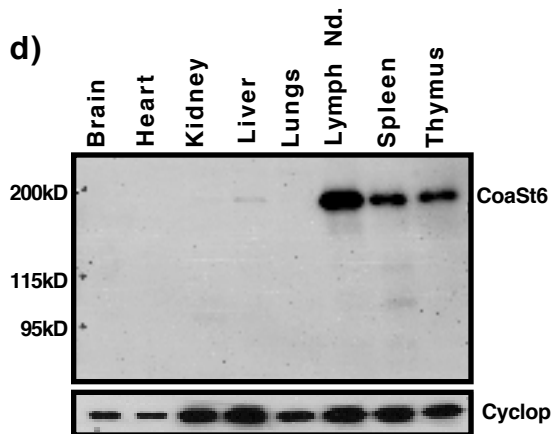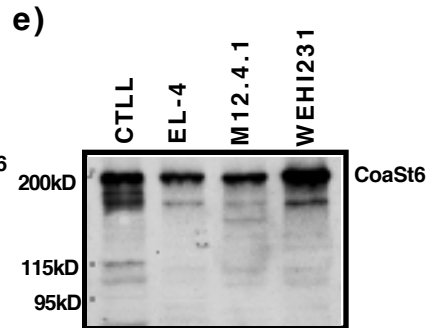

Supplement: pnas_0506981103_1.pdf [file pnas_0506981103_1.pdf]

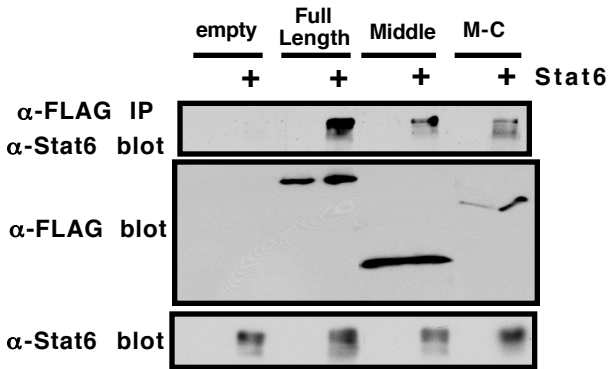

Supplement: pnas_0506981103_2.pdf [file pnas_0506981103_2.pdf]
